# Supplementary material
Source: PubMed Central journal article supplement (PMC4869849)
Supplement: NIHMS66054-supplement-ExDatFig7.pdf [file NIHMS66054-supplement-ExDatFig7.pdf]

|           | (Score)  | <u>12-cryptic-RSS</u>                             | <u>23-cryptic-RSS-antiparallel</u>                     | (Score)  |
|-----------|----------|---------------------------------------------------|--------------------------------------------------------|----------|
| MGC_Chr19 | (-57.29) | TCTG <u>CAGTGATGAGAATCACATGCACGTAGAA</u> .....    | <u>GAGCTGCTGGTGAAAGGTGAGGACGTCACCTGGGCCCTG</u>         | (-79.68) |
| MGD_Chr19 | (-62.84) | TTGTGAG <u>CAAGTCTCAGGGTCCTCACTGTCAACTG</u> ..... | <u>CTGGGCCCTGCCCCAGTCTCAGCTCGACCCTCGAGCTTG</u> TCCCAGG | (-77.42) |
| MGD_Chr13 | (-64.12) | ATT <u>CAAGTCTCAGAGGGACACCAGTGTGTTT</u> .....     | <u>TGACAAGTGGGGTCTTGGAGTCTTTAATTTCCCAT</u> TGA         | (-75.63) |
