# Supplementary material
Source: PubMed Central journal article supplement (PMC4869849)
Supplement: NIHMS66054-supplement-Supplementary_Table_1.pdf [file NIHMS66054-supplement-Supplementary_Table_1.pdf]

**Supplementary Table 1. Accession numbers of heavy and light chain immunoglobulin sequences of donors C and D**

| Donor C                 |                  |
|-------------------------|------------------|
| Immunoglobulin sequence | Accession number |
| MGC1-VH                 | KU058438         |
| MGC1-VK                 | KU058468         |
| MGC2-VH                 | KU058441         |
| MGC2-VK                 | KU058465         |
| MGC4-VH                 | KU058444         |
| MGC4-VL                 | KU058471         |
| MGC5-VH                 | KU058446         |
| MGC5-VL                 | KU058472         |
| MGC17-VH                | KU058440         |
| MGC17-VK                | KU058469         |
| MGC26-VH                | KU058442         |
| MGC26-VK                | KU058466         |
| MGC28-VH                | KU058449         |
| MGC28-VL                | KU058473         |
| MGC29-VH                | KU058447         |
| MGC29-VL                | KU058474         |
| MGC32-VH                | KU058439         |
| MGC32-VK                | KU058470         |
| MGC33-VH                | KU058450         |
| MGC33-VL                | KU058475         |
| MGC34-VH                | KU058451         |
| MGC34-VL                | KU058476         |
| MGC35-VH                | KU058448         |
| MGC35-VL                | KU058477         |
| MGC36-VH                | KU058445         |
| MGC36-VL                | KU058478         |
| MGC37-VH                | KU058443         |
| MGC37-VK                | KU058467         |

| Donor D                 |                  |
|-------------------------|------------------|
| Immunoglobulin sequence | Accession number |
| MGD16-VH                | KU058452         |
| MGD16-VK                | KU058479         |
| MGD21-VH                | KU058463         |
| MGD21-VK                | KU058480         |
| MGD23-VH                | KU058456         |
| MGD23-VK                | KU058481         |
| MGD24-VH                | KU058457         |
| MGD24-VK                | KU058482         |
| MGD30-VH                | KU058460         |
| MGD30-VK                | KU058483         |
| MGD33-VH                | KU058461         |
| MGD33-VK                | KU058484         |
| MGD34-VH                | KU058464         |
| MGD34-VK                | KU058485         |
| MGD39-VH                | KU058453         |
| MGD39-VK                | KU058486         |
| MGD41-VH                | KU058459         |
| MGD41-VK                | KU058487         |
| MGD47-VH                | KU058455         |
| MGD47-VK                | KU058488         |
| MGD53-VH                | KU058458         |
| MGD53-VK                | KU058489         |
| MGD55-VH                | KU058454         |
| MGD55-VK                | KU058490         |
| MGD56-VH                | KU058462         |
| MGD56-VK                | KU058491         |
