# Supplementary material
Source: PubMed Central journal article supplement (PMC4869849)

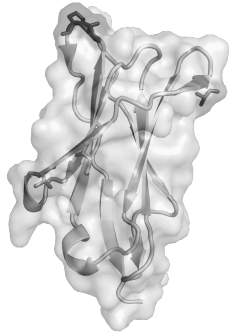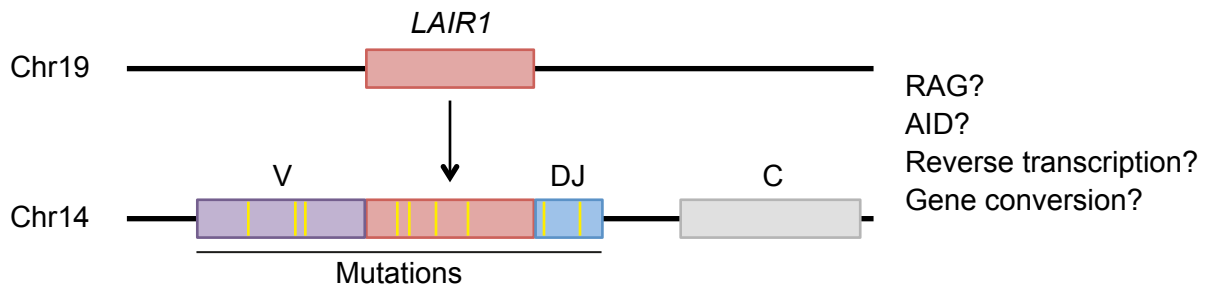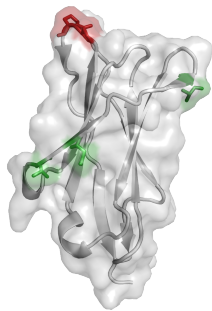

Supplement: NIHMS66054-supplement-ExDatFig10.pdf [file NIHMS66054-supplement-ExDatFig10.pdf]

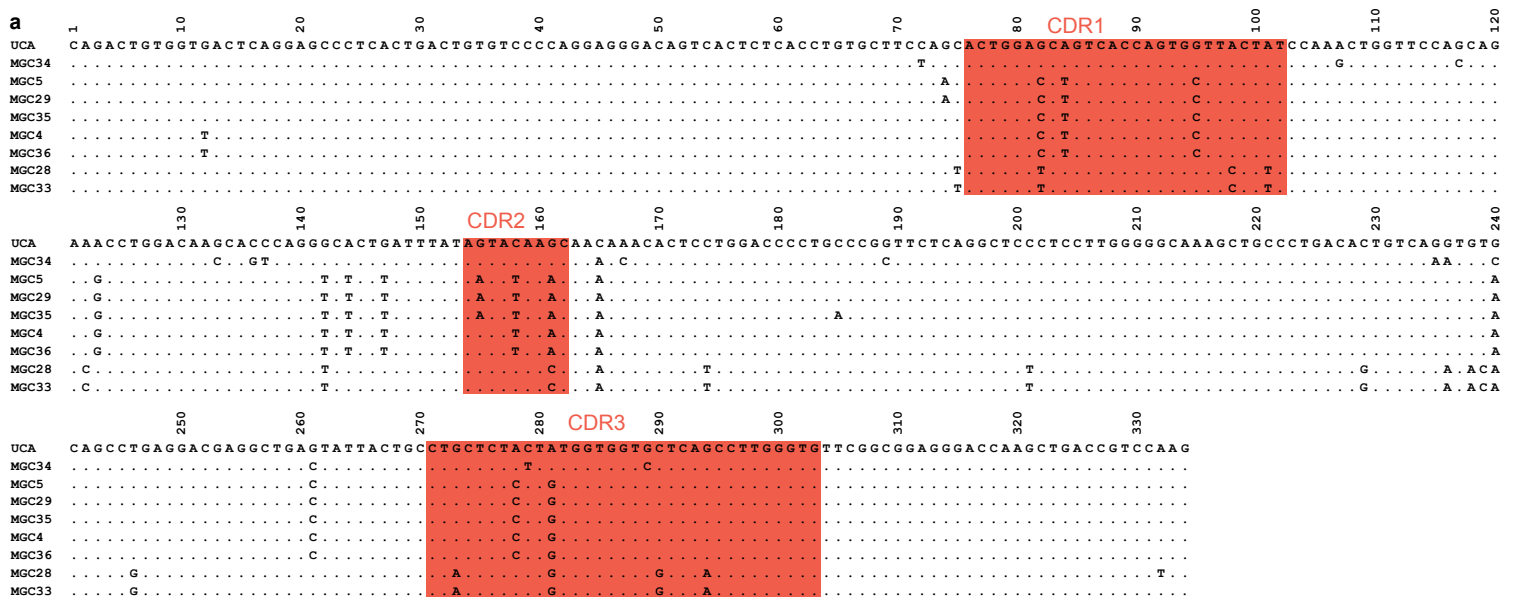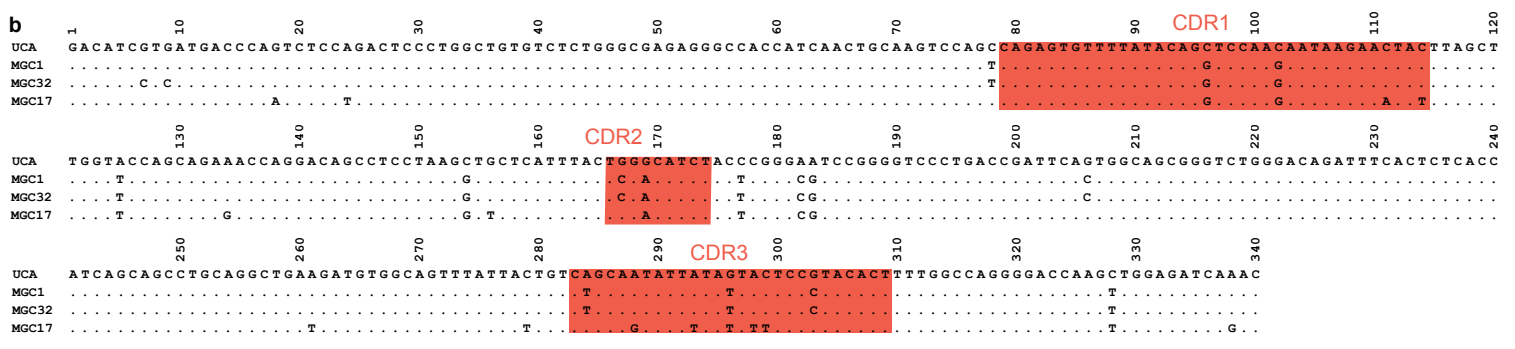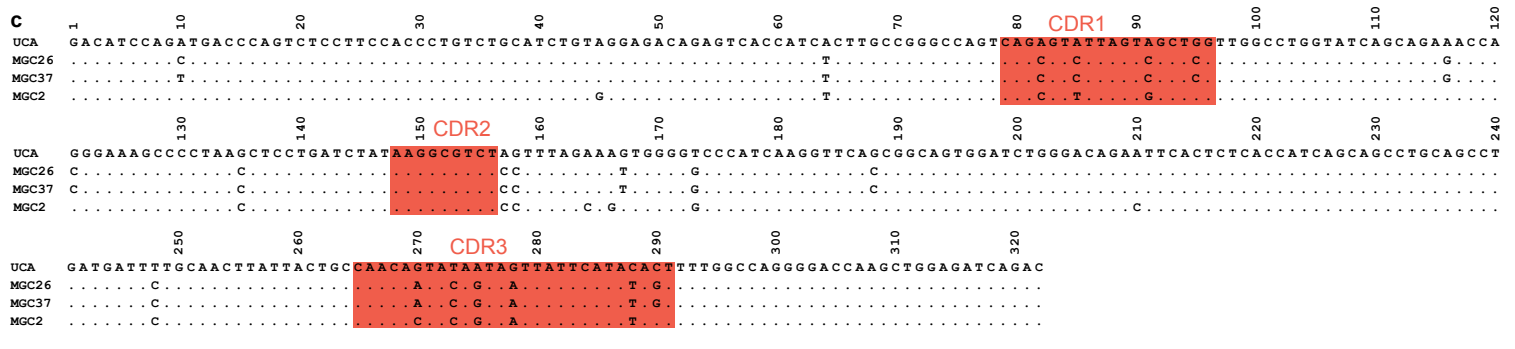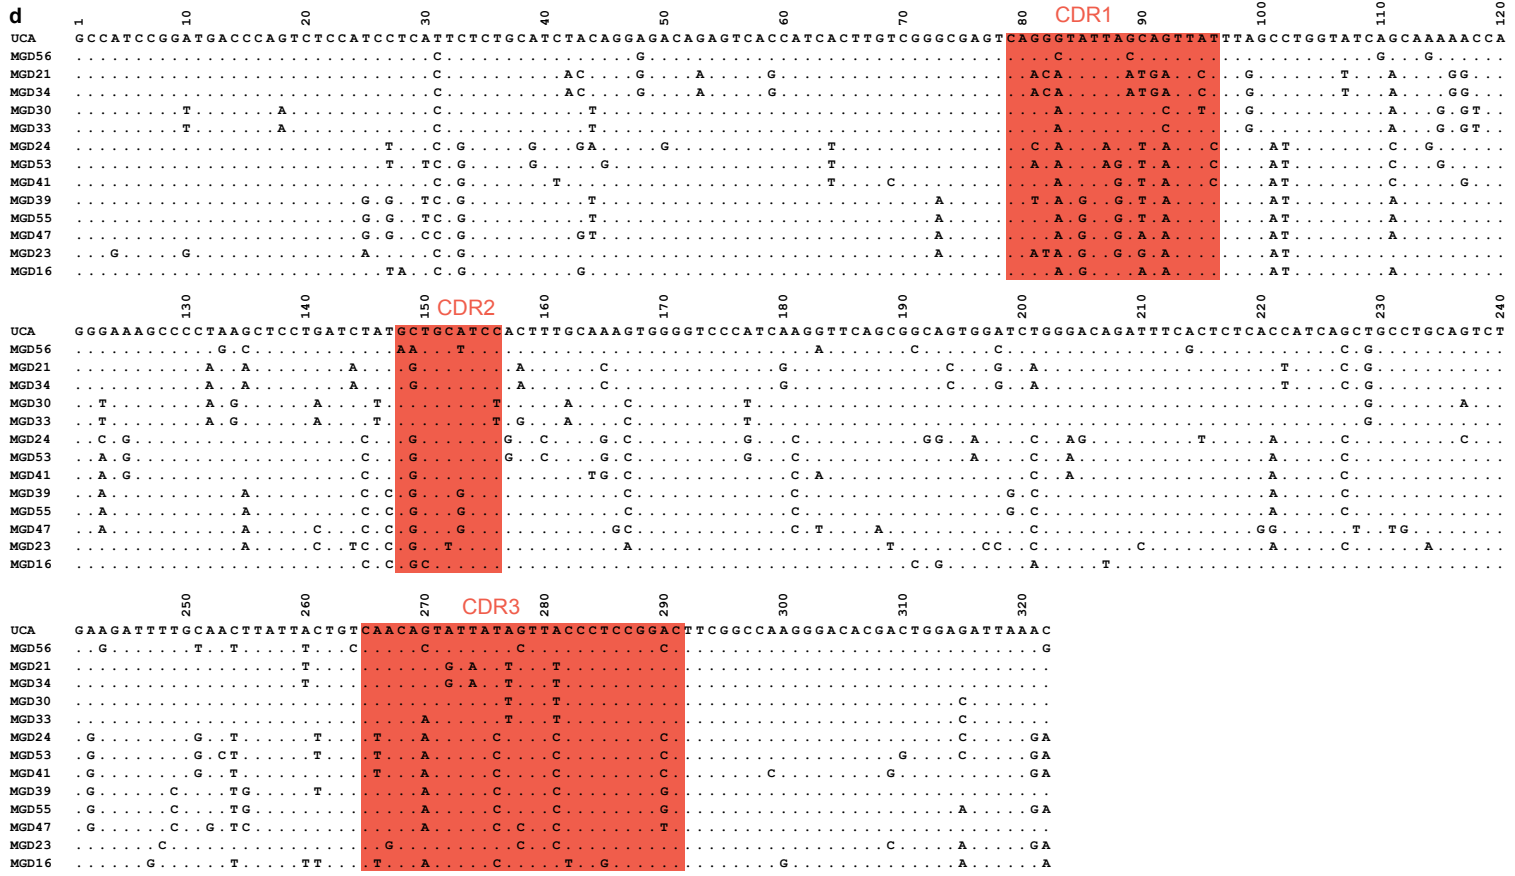

Supplement: NIHMS66054-supplement-ExDatFig4.pdf [file NIHMS66054-supplement-ExDatFig4.pdf]

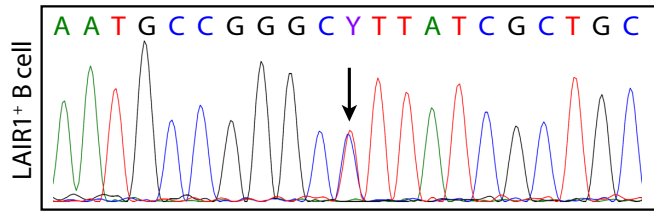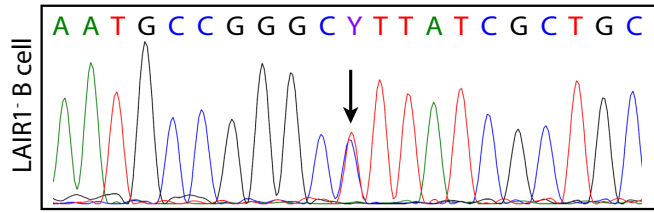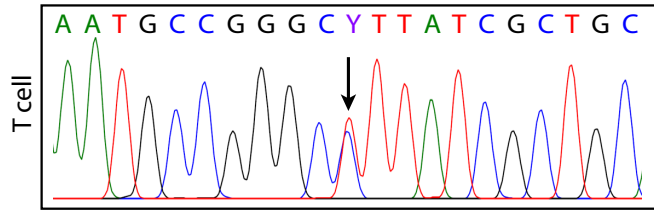

Supplement: NIHMS66054-supplement-ExDatFig8.pdf [file NIHMS66054-supplement-ExDatFig8.pdf]

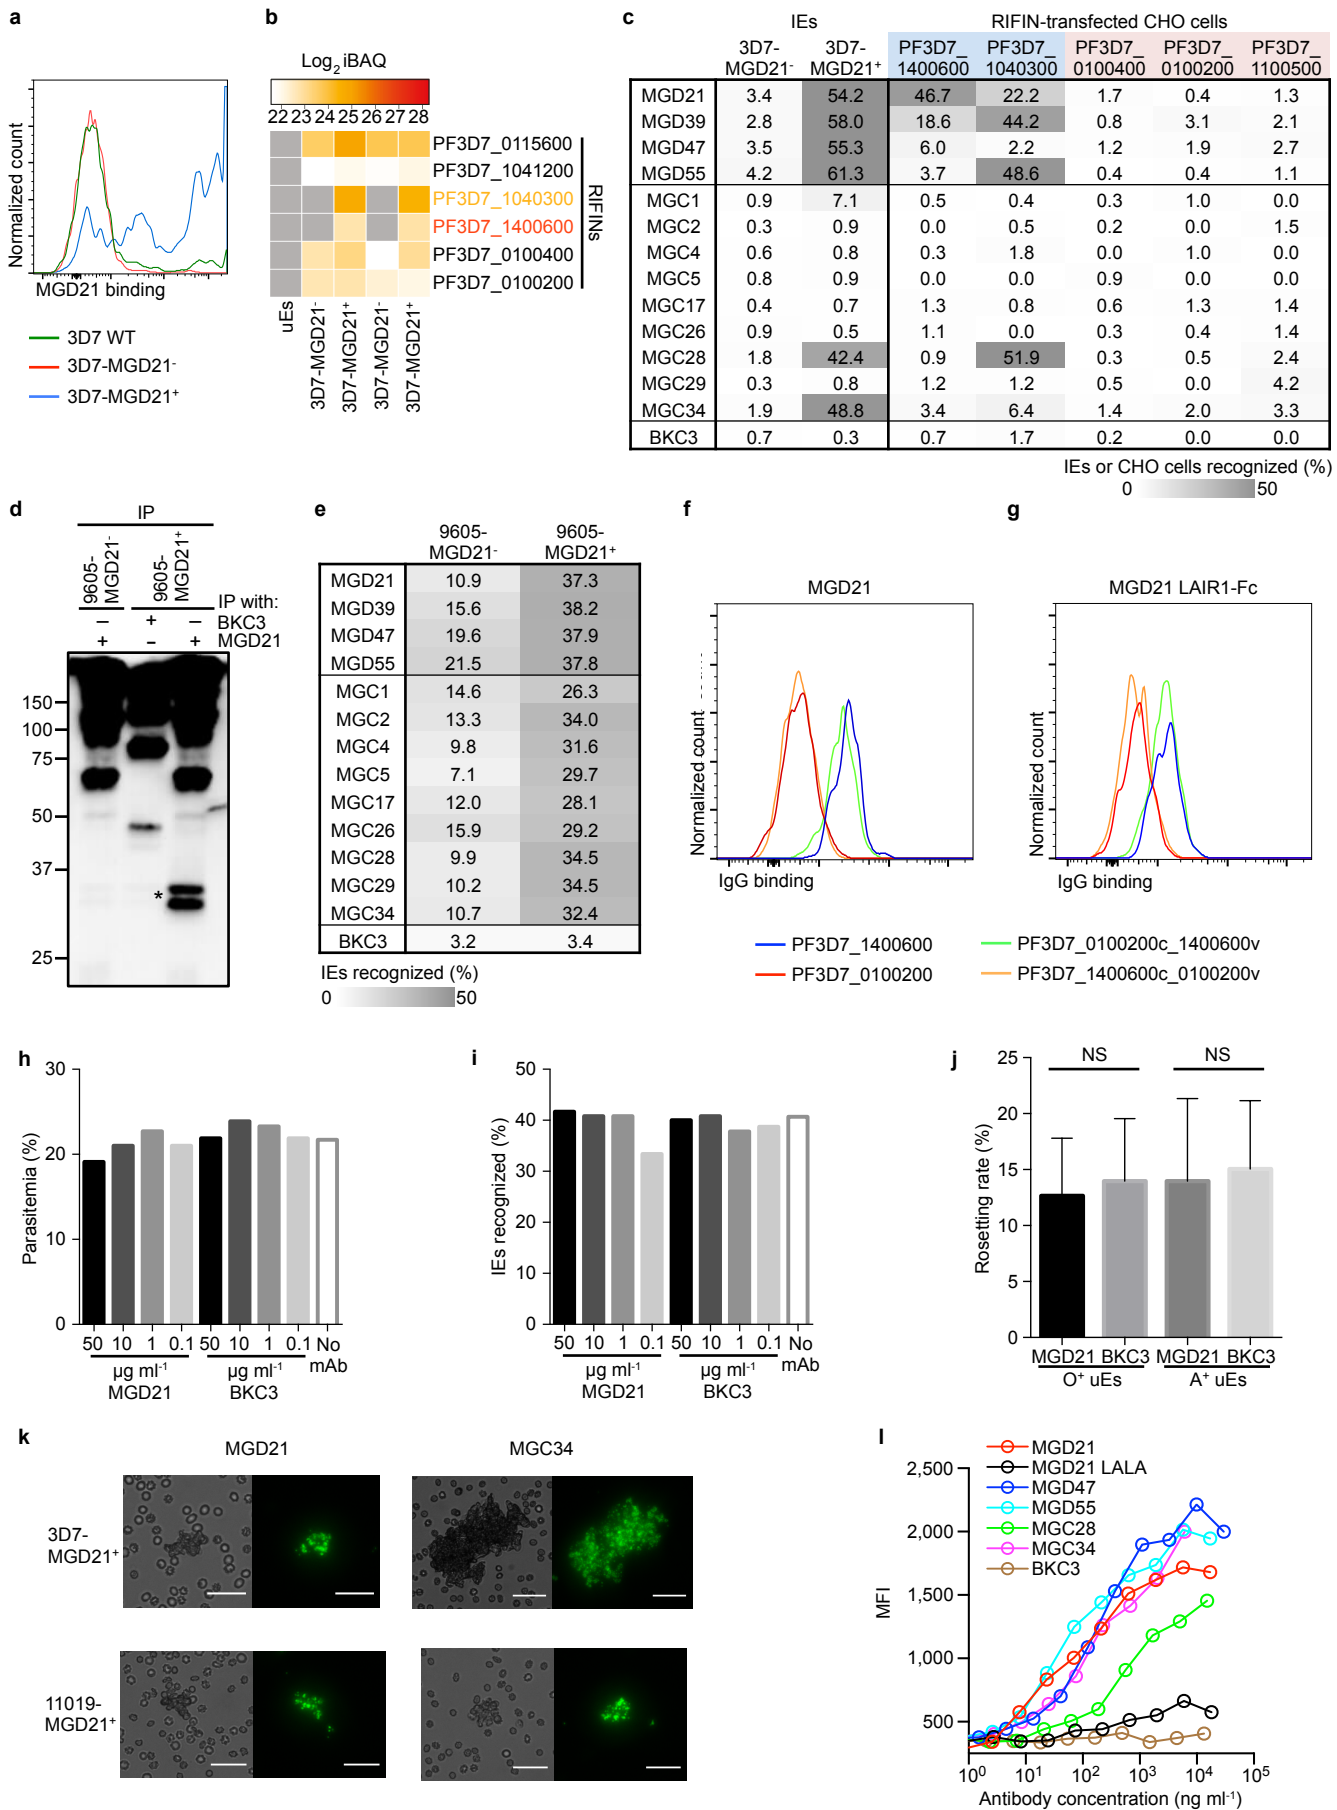

Supplement: NIHMS66054-supplement-ExDatFig9.pdf [file NIHMS66054-supplement-ExDatFig9.pdf]

(Inverted in Figure)

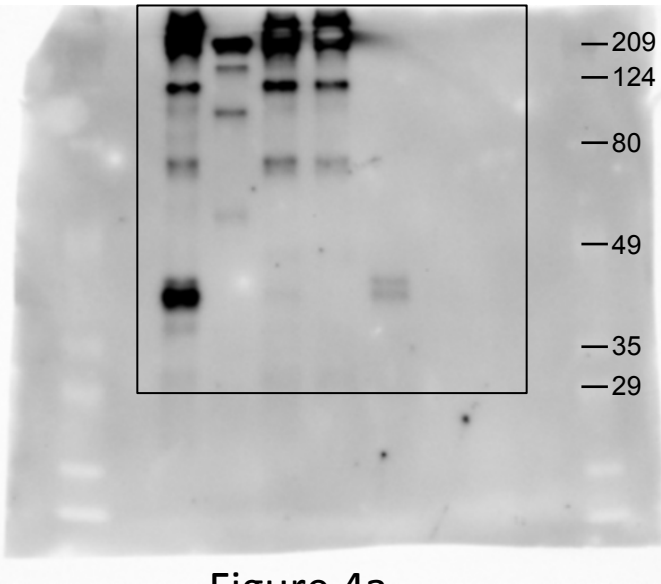

Figure 4a

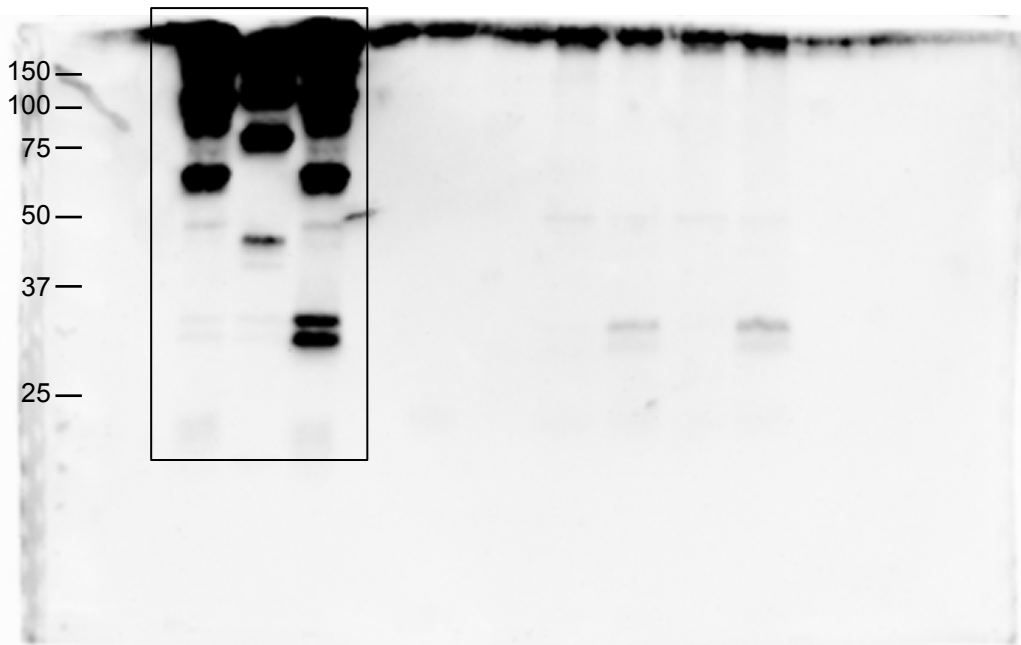

Ext Data Figure 9d

Supplement: NIHMS66054-supplement-Supplementary_Figure_1.pdf [file NIHMS66054-supplement-Supplementary_Figure_1.pdf]
